# Supplementary material for: Maternal hypertensive disorder of pregnancy and mortality in offspring from birth to young adulthood: national population based cohort study
Source: PubMed Central journal article supplement — BMJ. 2022 Oct 19;379:e072157. doi: 10.1136/bmj-2022-072157 (PMC9580246; doi:10.1136/bmj-2022-072157), 2022-10-19
Supplement: huac072157.ww.pdf [file huac072157.ww.pdf]

# **Maternal hypertensive disorder of pregnancy and offspring mortality in childhood, adolescence, and young adulthood: A national population-based cohort study**

## **Supplementary Material**

### **Table of contents**

Appendix S1. Detailed descriptions of registers used in this study

Appendix S2. Detailed descriptions of covariates and multiple imputation methods

Appendix S3. Analysis codes for the study

Table S1. Exposure classification of hypertensive disorder of pregnancy from the International Classification of Diseases, the 8th and 10th versions (ICD-8 and ICD-10)

Table S2. Outcome classification of cause of death from the International Classification of Diseases, the 8th and 10th versions (ICD-8 and ICD-10)

Table S3. Associations between maternal HDP and all-cause mortality in offspring of sibling pairs

Table S4. Association between paternal hypertension before pregnancy and all-cause mortality in offspring

Table S5. Associations between maternal HDP and all-cause mortality in offspring according to SGA

Table S6. Subanalyses of the association between maternal HDP and all-cause mortality in offspring

Table S7. Association between maternal HDP and all-cause mortality in offspring using restricted cubic splines for continuous covariates

Table S8. The risk of all-cause mortality in offspring according to the timing and severity of maternal pre-eclampsia based on different cutoff points of 35 or 36 weeks for timing of pre-eclampsia

Table S9. Associations between maternal HDP and all-cause mortality in offspring according to different follow up years

Table S10 Associations between maternal HDP and all-cause mortality in offspring in different age groups

Figure S1. Flow chart of the study population

Figure S2. Causal diagram showing selection of covariates for confounding control

Figure S3. The log-minus-log survival curve for maternal HDP and all-cause mortality in offspring

Figure S4. The log-minus-log survival curves for maternal HDP and cause-specific mortality in offspring

Figure S5. Associations between maternal HDP and all-cause mortality in offspring by sex and parity

Figure S6. Change of all-cause mortality risk over offspring age among offspring exposed to maternal HDP compared to unexposed offspring

Figure S7. Cumulative incidence of cause-specific mortality among offspring exposed and unexposed to maternal HDP

Figure S8. Incidence rates (95% CIs) of cause-specific mortality according to maternal HDP

**Appendix S1. Detailed descriptions of registers used in this study<sup>a</sup>**

| <b>Register</b>                             | <b>Description</b>                                                                                                                                                                                                                                                                                                                                                                                                                                                                                                                          | <b>Reference</b> |
|---------------------------------------------|---------------------------------------------------------------------------------------------------------------------------------------------------------------------------------------------------------------------------------------------------------------------------------------------------------------------------------------------------------------------------------------------------------------------------------------------------------------------------------------------------------------------------------------------|------------------|
| The Danish Civil Registration System (CRS)  | The Danish Civil Registration System (CRS) has been established since 1968, and collects information on date of birth, emigration, and immigration, sex, and other vital status in a daily basis.                                                                                                                                                                                                                                                                                                                                           | 1                |
| The Danish Medical Birth Register (DMBR)    | The Danish Medical Birth Register (DMBR) includes Central Personal Register number (CPR) of new births, mothers, and fathers, as well as information on date of birth, birth characteristics such as sex, birth weight, gestational age, maternal characteristics such as maternal pre-pregnancy body mass index, maternal smoking during pregnancy. DMBR was established in 1968 and has been computerized since 1973.                                                                                                                     | 2                |
| The Danish National Patient Register (DNPR) | The Danish National Patient Register (DNPR) was established in 1977 and collects data from inpatient, outpatient and emergency hospital record (each visit for one record in register). Information includes dates of contact, primary and secondary discharge diagnoses, dates and procedures of surgery, certain treatment in hospitals, and other hospital related information. Diagnoses are classified according to the ICD-8 codes ( <i>International Classification of Disease</i> codes, 8th revision) and ICD-10 codes thereafter. | 3                |
| The Danish Register of Causes of Death      | The Danish Register of Causes of Death has been computerized since 1970 and the non-electronic data on deaths has been collected since 1924. This system has been collecting date of death, and underlying cause and                                                                                                                                                                                                                                                                                                                        | 4                |

|                                                                        |                                                                                                                                                   |   |
|------------------------------------------------------------------------|---------------------------------------------------------------------------------------------------------------------------------------------------|---|
|                                                                        | contributory causes of death by law in Denmark. The ICD-8 was used to classify the causes of death during 1970-1993 and ICD-10 from 1994.         |   |
| The Danish Integrated Database for Longitudinal Labour Market Research | The Danish Integrated Database for Longitudinal Labour Market Research was established in 1981 and contains labour market and socioeconomic data. | 5 |

<sup>a</sup>Denmark has been providing public welfare, including universal health care, education, student assistance, disability pensions, and unemployment insurance through tax-funded services. There are population-based health databases in Denmark that regularly collect high-quality data, including individual medical data. All live births and new residents in Denmark have been assigned a unique 10-digit individual personal identification number (Central Personal Register number, CPR) since the 1960s. The CPR number links information across different national registers.

## **Appendix S2. Detailed descriptions of covariates and multiple imputation methods**

Information on maternal and birth characteristics was retrieved from the Danish Medical Birth Register,<sup>2</sup> and socioeconomic factors were retrieved from the Danish Integrated Database for Longitudinal Labour Market Research,<sup>5</sup> and the Danish Civil Registration System.<sup>1</sup> These included sex (male, female), singleton (yes, no), parity (1, 2,  $\geq 3$  children), birth year of the child (1977-1980, 5-year intervals during 1981-2015, and 2016-2018), maternal age (<20, 20-24, 25-29, 30-34,  $\geq 35$  years), maternal smoking during pregnancy (yes, no), maternal cohabitation (single, cohabitating), maternal residence (Copenhagen, big cities  $\geq 100\ 000$  inhabitants, other places), maternal country of origin (Denmark, non-Denmark), maternal education before pregnancy (low: 0-9 years, medium: 10-14 years, high:  $\geq 15$  years), maternal income at birth (no income, 3 tertiles), maternal pre-pregnancy BMI (underweight:  $<18.5\ \text{kg/m}^2$ , normal:  $18.5\text{-}24.9\ \text{kg/m}^2$ , overweight:  $25.0\text{-}29.9\ \text{kg/m}^2$ , obese:  $\geq 30.0\ \text{kg/m}^2$ ). Information on maternal history of diabetes and parental CVD history was obtained from the Danish National Patient Register.<sup>3</sup>

The frequency of missing data in this study was relatively low: 0.05% for sex, 1.64% for maternal education, 0.04% for maternal cohabitation, 0.02% for maternal income, and 0.97% for paternal history of CVD. The frequency of missing data for maternal smoking (available since 1991) was 3.44% and maternal BMI (available since 2004) was 3.65%.

Multiple imputation methods imputed with 10 replications was used to deal with missing values in this study.<sup>6</sup> We imputed missing variables using the fully conditional specification (FCS) method in which logistic regression was used for categorical variables and predictive

mean matching for continuous variables. The imputation model included the following variables: maternal HDP (yes, no), offspring mortality (yes, no), sex of offspring (male, female), singleton births (yes, no), parity (1, 2,  $\geq 3$  children), birth year of the child (1977-1980, 5-year intervals during 1981-2015, and 2016-2018), maternal age (<20, 20-24, 25-29, 30-34,  $\geq 35$  years), maternal smoking during pregnancy (yes, no), maternal cohabitation (single, cohabitating), maternal residence (Copenhagen, big cities  $\geq 100\ 000$  inhabitants, other places), maternal country of origin (Denmark, non-Denmark), maternal education before pregnancy (low 0-9 years, medium 10-14 years, high  $\geq 15$  years), maternal income at birth (no income, 3 tertiles), maternal pre-pregnancy BMI (underweight:  $< 18.5$  kg/m<sup>2</sup>, normal: 18.5-24.9 kg/m<sup>2</sup>, overweight: 25.0-29.9 kg/m<sup>2</sup>, obese:  $\geq 30.0$  kg/m<sup>2</sup>), maternal history of diabetes (yes, no), maternal and paternal history of CVD before childbirth (yes, no). As the data on maternal smoking was available since 1991 and data on maternal pre-pregnancy BMI was available since 2004, the imputation model for maternal smoking and maternal pre-pregnancy BMI was only restricted to offspring born since 1991 and 2004, respectively.

## References

1. Schmidt M, Pedersen L, Sorensen HT. The Danish Civil Registration System as a tool in epidemiology. *European journal of epidemiology*. Aug 2014;29(8):541-549.
2. Knudsen LB, Olsen J. The Danish Medical Birth Registry. *Danish medical bulletin*. Jun 1998;45(3):320-323.
3. Lynge E, Sandegaard JL, Rebolj M. The Danish National Patient Register. *Scandinavian journal of public health*. Jul 2011;39(7 Suppl):30-33.
4. Helweg-Larsen K. The Danish Register of Causes of Death. *Scandinavian journal of public health*. Jul 2011;39(7 Suppl):26-29.
5. Petersson F, Baadsgaard M, Thygesen LC. Danish registers on personal labour market affiliation. *Scandinavian journal of public health*. Jul 2011;39(7 Suppl):95-

98.

6. Sterne J A C, White I R, Carlin J B, Spratt M, Royston P, Kenward M G et al. Multiple imputation for missing data in epidemiological and clinical research: potential and pitfalls BMJ 2009; 338 :b2393 doi:10.1136/bmj.b2393.

### Appendix S3. Analysis codes for the study

```
/*Project          |maternal HDP and offspring mortality
/*Date            |2021-04-30
/*platform        |Windown 64 bit
/*SAS Version     |9.4
/*Dataset used    |Analysis.final

-----
*****Main Code*****
-----*/

/*Codes for association between maternal HDP and offspring
all-cause mortality*/

*create dataset for analysis;
*cox_time_fup: follow-up time;
data sla_data;
set analysis.final;
exp_cat=exp_cat_2;* define exposure as HDP 1 or 0;
run;

ods output Estimates=rrisk0;
ods select Estimates;
proc phreg data=sla_data fast nosummary;*crude HR for main
association;
class exp_cat(ref="0") /param=ref;
model cox_time_fup*outcome(0)=exp_cat/ties=efron rl;
estimate "exp_cat cHR1" exp_cat 1/exp cl;
run;

*adjusted model;
ods output Estimates=rrisk1;
ods select Estimates;
proc phreg data=sla_data fast nosummary;*adjusted HR for main
association;
class exp_cat(ref="0") singleton sex parity mageg msmoke
edu_cat mcohab mresid
cvd_total_m cvd_total_f dm_total_m morigin income_cat mbmi_cat
birth_yr_cat/param=ref;
model cox_time_fup*outcome(0)=exp_cat singleton sex parity
mageg msmoke edu_cat mcohab mresid
cvd_total_m cvd_total_f dm_total_m morigin income_cat mbmi_cat
```



```

birth_yr_cat/ties=efron rl;
estimate "exp_cat CHR1" exp_cat 1/exp cl;
run;

*specific types of exposure;
data sla_data;
set analysis.final;
exp_cat=exp_cat_8;* define exposure for subtypes;
run;

ods output Estimates=rrisk0;
ods select Estimates;
proc phreg data=sla_data fast nosummary;*crude HR for main
association;
class exp_cat(ref="0") /param=ref;
model cox_time_fup*outcome(0)=exp_cat/ties=efron rl;
estimate "exp_cat CHR1" exp_cat 1/exp cl;
estimate "exp_cat CHR2" exp_cat 0 1/exp cl;
estimate "exp_cat CHR3" exp_cat 0 0 1/exp cl;
estimate "exp_cat CHR4" exp_cat 0 0 0 1/exp cl;
estimate "exp_cat CHR5" exp_cat 0 0 0 0 1/exp cl;
estimate "exp_cat CHR6" exp_cat 0 0 0 0 0 1/exp cl;
estimate "exp_cat CHR7" exp_cat 0 0 0 0 0 0 1/exp cl;
run;

*adjusted model;
ods output Estimates=rrisk1;
ods select Estimates;
proc phreg data=sla_data fast nosummary;*adjusted HR for main
association;
class exp_cat(ref="0") singleton sex parity mageg msmove
edu_cat mcohab mresid
cvd_total_m cvd_total_f dm_total_m morigin income_cat mbmi_cat
birth_yr_cat/param=ref;
model cox_time_fup*outcome(0)=exp_cat singleton sex parity
mageg msmove edu_cat mcohab mresid
cvd_total_m cvd_total_f dm_total_m morigin income_cat mbmi_cat
birth_yr_cat/ties=efron rl;
estimate "exp_cat CHR1" exp_cat 1/exp cl;
estimate "exp_cat CHR2" exp_cat 0 1/exp cl;
estimate "exp_cat CHR3" exp_cat 0 0 1/exp cl;
estimate "exp_cat CHR4" exp_cat 0 0 0 1/exp cl;
estimate "exp_cat CHR5" exp_cat 0 0 0 0 1/exp cl;
estimate "exp_cat CHR6" exp_cat 0 0 0 0 0 1/exp cl;

```

```

estimate "exp_cat cHR7" exp_cat 0 0 0 0 0 0 1/exp cl;
run;

/*Codes for cause-specific mortality*/

%macro specific (outcome_num,name);
data sla_data;
set analysis.final;
exp_cat=exp_cat_2;
outcome=outcome&outcome_num;
run;

ods output Estimates=rrisk0;
ods select Estimates;
proc phreg data=sla_data fast nosummary;*crude HR for main
association;
class exp_cat(ref="0") /param=ref;
model cox_time_fup*outcome(0)=exp_cat/ties=efron rl;
estimate "exp_cat cHR1" exp_cat 1/exp cl;
run;

*adjusted model;
ods output Estimates=rrisk1;
ods select Estimates;
proc phreg data=sla_data fast nosummary;*adjusted HR for main
association;
class exp_cat(ref="0") singleton sex parity mageg msmoke
edu_cat mcohab mresid
cvd_total_m cvd_total_f dm_total_m morigin income_cat mbmi_cat
birth_yr_cat/param=ref;
model cox_time_fup*outcome(0)=exp_cat singleton sex parity
mageg msmoke edu_cat mcohab mresid
cvd_total_m cvd_total_f dm_total_m morigin income_cat mbmi_cat
birth_yr_cat/ties=efron rl;
estimate "exp_cat cHR1" exp_cat 1/exp cl;
run;

%mend;

%specific(1,cvd);
%specific(2,cancer);
%specific(3,infectious);
%specific(4,metabolic);

```

```
%specific(5,mental);  
%specific(6,nervous);  
%specific(7,respiratory);  
%specific(8,digestive);  
%specific(9,musculoskeletal);  
%specific(10,genitourinary);  
%specific(11,perinatal);  
%specific(12,malformation);  
%specific(13,external);  
%specific(14,other);
```

**Table S1. Exposure classification of hypertensive disorder of pregnancy from the International Classification of Diseases, the 8th and 10th versions (ICD-8 and ICD-10) <sup>a</sup>**

|                                                    | ICD-8          | ICD-10 |
|----------------------------------------------------|----------------|--------|
| Pre-eclampsia and eclampsia                        |                |        |
| Moderate pre-eclampsia                             | 63703          | O14.0  |
| Severe pre-eclampsia                               | 63704          | O14.1  |
| HELLP syndrome                                     |                | O14.2  |
| Unspecified pre-eclampsia                          | 63709          | O14.9  |
| Eclampsia                                          | 63719          | O15    |
| Gestational hypertension                           |                |        |
| Gestational (pregnancy-induced) hypertension       | 63700          | O13    |
| Unspecified maternal hypertension                  | 76029          | O16    |
| Pre-gestational hypertension                       |                |        |
| Essential hypertension                             | 40009          | I10    |
| Hypertensive heart disease                         | 40019<br>40029 | I11    |
| Hypertensive renal disease                         | 40039          | I12    |
| Hypertensive heart and renal disease               | 40099          | I13    |
| Secondary hypertension                             | 40199          | I15    |
| Pre-existing hypertension complicating pregnancy   |                | O10    |
| Pre-eclampsia superimposed on chronic hypertension |                | O11    |

<sup>a</sup> Information on maternal hypertensive disorder of pregnancy came from the Danish National Patient Register.

**Table S2. Outcome classification of cause of death from the International Classification of Diseases, the 8th and 10th versions (ICD-8 and ICD-10)<sup>a</sup>**

| <b>Cause of Deaths</b>                                      | <b>ICD-8</b>          | <b>ICD-10</b>  |
|-------------------------------------------------------------|-----------------------|----------------|
| <b>All cause of death</b>                                   | <b>000-E999</b>       | <b>A00-Y89</b> |
| <b>Specific causes of death</b>                             |                       |                |
| Infectious and parasitic diseases                           | 000-136               | A00-B99        |
| Malignant neoplasms                                         | 140-209               | C00-C97        |
| Endocrine, nutritional and metabolic diseases               | 240-279               | E00-E89        |
| Mental and behavioural disorders                            | 290-315               | F01-F99        |
| Diseases of the nervous system and the sense organs         | 320-389               | G00-H95        |
| Diseases of the circulatory system                          | 390-444.1, 444.3-458, | I00-I99        |
| Diseases of the respiratory system                          | 460-519               | J00-J99        |
| Diseases of the digestive system                            | 520-577, 444.2        | K00-K92        |
| Diseases of the musculoskeletal system or connective tissue | 710-738               | M00-M99        |
| Diseases of the genitourinary system                        | 580-629, 792          | N00-N99        |
| Certain conditions originating in the perinatal period      | 760-779               | P00-P96        |
| Congenital malformations and chromosomal abnormalities      | 740-759               | Q00-Q99        |
| External causes of morbidity and mortality                  | E800-E999             | V01-Y89        |

<sup>a</sup> Information on deaths came from the Danish Cause of Death Register.

**Table S3. Associations between maternal HDP and all-cause mortality in offspring of sibling pairs**

|                                 | <b>Exposure</b> | <b>No. of deaths</b> | <b>Follow-up time (person years)</b> | <b>Rate (1/10<sup>5</sup> person years)</b> | <b>cHR (95%CI)</b>  | <b>aHR<sup>b</sup> (95%CI)</b> |
|---------------------------------|-----------------|----------------------|--------------------------------------|---------------------------------------------|---------------------|--------------------------------|
| <b>Half-sibling<sup>a</sup></b> | No maternal HDP | 16174                | 37453153.37                          | 43.18                                       | 1.0 (reference)     | 1.0 (reference)                |
|                                 | Maternal HDP    | 842                  | 1446608.97                           | 58.21                                       | 1.27 (1.13 to 1.43) | 1.15 (1.01 to 1.30)            |
| <b>Full-sibling<sup>a</sup></b> | No maternal HDP | 13606                | 33472377.85                          | 40.65                                       | 1.0 (reference)     | 1.0 (reference)                |
|                                 | Maternal HDP    | 699                  | 1290702.57                           | 54.16                                       | 1.30 (1.14 to 1.48) | 1.19 (1.04 to 1.36)            |

Abbreviations: HDP, hypertensive disorder of pregnancy; cHR, crude hazard ratio; aHR, adjusted hazard ratio.

<sup>a</sup> Half-sibling: sibling pairs of offspring born to the same mother; full-sibling: sibling pairs of offspring born to the same father and mother.

<sup>b</sup> Offspring's age as time scale, adjusted for calendar year, sex, singleton, parity, birth year of the child, maternal age, maternal smoking, maternal cohabitation, maternal country of origin, maternal residence, maternal education, maternal income at birth, maternal pre-pregnancy BMI, maternal history of diabetes and parental CVD before childbirth.

**Table S4. Association between paternal hypertension before pregnancy and all-cause mortality in offspring**

| <b>Exposure</b>          | <b>No. of deaths</b> | <b>Follow-up time (person years)</b> | <b>Rate (1/10<sup>5</sup> person years)</b> | <b>cHR (95%CI)</b>  | <b>aHR<sup>a</sup> (95%CI)</b> |
|--------------------------|----------------------|--------------------------------------|---------------------------------------------|---------------------|--------------------------------|
| No paternal hypertension | 20070                | 47221473.65                          | 42.50                                       | 1.0 (reference)     | 1.0 (reference)                |
| Paternal hypertension    | 70                   | 153041.87                            | 45.74                                       | 0.97 (0.77 to 1.23) | 1.20 (0.94 to 1.54)            |

Abbreviations: cHR, crude hazard ratio; aHR, adjusted hazard ratio.

<sup>a</sup> Offspring's age as time scale, adjusted for calendar year, sex, singleton, parity, birth year of the child, maternal age, maternal smoking, maternal cohabitation, maternal country of origin, maternal residence, maternal education, maternal income at birth, maternal pre-pregnancy BMI, maternal history of diabetes and parental CVD before childbirth.

**Table S5. Associations between maternal HDP and all-cause mortality in offspring according to SGA<sup>a</sup>**

| <b>SGA</b> | <b>Exposure</b> | <b>No. of deaths</b> | <b>Follow-up time (person years)</b> | <b>Rate (1/10<sup>5</sup> person years)</b> | <b>cHR (95%CI)</b>  | <b>aHR<sup>b</sup> (95%CI)</b> |
|------------|-----------------|----------------------|--------------------------------------|---------------------------------------------|---------------------|--------------------------------|
| <b>Yes</b> | No maternal HDP | 2972                 | 4095316.55                           | 72.57                                       | 1.0 (reference)     | 1.0 (reference)                |
|            | Maternal HDP    | 294                  | 272846.85                            | 107.75                                      | 1.42 (1.26 to 1.60) | 1.53 (1.36 to 1.73)            |
| <b>No</b>  | No maternal HDP | 16147                | 41439062.17                          | 38.97                                       | 1.0 (reference)     | 1.0 (reference)                |
|            | Maternal HDP    | 727                  | 1567289.95                           | 46.39                                       | 1.16 (1.08 to 1.25) | 1.12 (1.04 to 1.21)            |

Abbreviations: HDP, hypertensive disorder of pregnancy; SGA, small for gestational age; cHR, crude hazard ratio; aHR, adjusted hazard ratio.

<sup>a</sup> SGA defined as infants whose birthweight below the 10th percentile for infants of the same gestational age, sex, and birth year

<sup>b</sup> Offspring's age as time scale, adjusted for calendar year, sex, singleton, parity, birth year of the child, maternal age, maternal smoking, maternal cohabitation, maternal country of origin, maternal residence, maternal education, maternal income at birth, maternal pre-pregnancy BMI, maternal history of diabetes and parental CVD before childbirth.



**Table S6. Subanalyses of the association between maternal HDP and all-cause mortality in offspring**

|                                                        | <b>Exposure</b>             | <b>No. of deaths</b> | <b>Follow-up time (person years)</b> | <b>Rate (1/10<sup>5</sup> person years)</b> | <b>cHR (95%CI)</b>  | <b>aHR<sup>a</sup> (95%CI)</b> |
|--------------------------------------------------------|-----------------------------|----------------------|--------------------------------------|---------------------------------------------|---------------------|--------------------------------|
| <b>Additional adjustment for paternal hypertension</b> | <b>No maternal HDP</b>      | 19119                | 45534378.72                          | 41.99                                       | 1.0 (Reference)     | 1.0 (Reference)                |
|                                                        | <b>Maternal HDP</b>         | 1021                 | 1840136.80                           | 55.49                                       | 1.28 (1.21 to 1.37) | 1.26 (1.18 to 1.34)            |
|                                                        | Pre-eclampsia or Eclampsia  | 798                  | 1337690.23                           | 59.66                                       | 1.42 (1.32 to 1.52) | 1.30 (1.21 to 1.40)            |
|                                                        | Pre-eclampsia               | 781                  | 1324978.47                           | 58.94                                       | 1.40 (1.30 to 1.50) | 1.29 (1.20 to 1.38)            |
|                                                        | Moderate                    | 423                  | 1013731.05                           | 41.73                                       | 1.00 (0.91 to 1.10) | 0.90 (0.82 to 0.99)            |
|                                                        | Severe                      | 279                  | 208803.94                            | 133.62                                      | 3.10 (2.75 to 3.49) | 3.00 (2.66 to 3.37)            |
|                                                        | HELLP syndrome              | 30                   | 18671.24                             | 160.67                                      | 3.11 (2.18 to 4.45) | 4.78 (3.34 to 6.84)            |
|                                                        | Unspecified                 | 49                   | 83772.24                             | 58.49                                       | 1.44 (1.09 to 1.91) | 1.31 (0.99 to 1.73)            |
|                                                        | Eclampsia                   | 17                   | 12711.76                             | 133.73                                      | 3.17 (1.97 to 5.10) | 2.89 (1.80 to 4.65)            |
|                                                        | Hypertension                | 223                  | 502446.57                            | 44.38                                       | 0.96 (0.84 to 1.10) | 1.12 (0.98 to 1.27)            |
|                                                        | Pregestational hypertension | 81                   | 181836.48                            | 44.55                                       | 0.90 (0.72 to 1.12) | 1.26 (1.01 to 1.57)            |
|                                                        | Gestational hypertension    | 142                  | 320610.09                            | 44.29                                       | 1.00 (0.85 to 1.18) | 1.05 (0.89 to 1.24)            |
| <b>Offspring born after 1991</b>                       | <b>No maternal HDP</b>      | 6897                 | 22161734.73                          | 31.12                                       | 1.0 (Reference)     | 1.0 (Reference)                |
|                                                        | <b>Maternal HDP</b>         | 440                  | 918811.23                            | 47.89                                       | 1.46 (1.33 to 1.61) | 1.40 (1.27 to 1.55)            |
|                                                        | Pre-eclampsia or Eclampsia  | 337                  | 619593.37                            | 54.39                                       | 1.72 (1.54 to 1.92) | 1.54 (1.38 to 1.72)            |
|                                                        | Pre-eclampsia               | 329                  | 612917.05                            | 53.68                                       | 1.70 (1.52 to 1.90) | 1.52 (1.36 to 1.70)            |
|                                                        | Moderate                    | 137                  | 440245.69                            | 31.12                                       | 0.99 (0.84 to 1.17) | 0.90 (0.76 to 1.06)            |
|                                                        | Severe                      | 138                  | 117289.26                            | 117.66                                      | 3.65 (3.09 to 4.32) | 3.18 (2.68 to 3.77)            |
|                                                        | HELLP syndrome              | 30                   | 18671.24                             | 160.67                                      | 4.49 (3.13 to 6.42) | 4.61 (3.22 to 6.61)            |
|                                                        | Unspecified                 | 24                   | 36710.85                             | 65.38                                       | 2.21 (1.48 to 3.30) | 1.86 (1.25 to 2.78)            |
|                                                        | Eclampsia                   | 8                    | 6676.32                              | 119.83                                      | 3.85 (1.92 to 7.70) | 3.45 (1.72 to 6.89)            |

|                                  |                             |      |             |        |                      |                      |
|----------------------------------|-----------------------------|------|-------------|--------|----------------------|----------------------|
|                                  | Hypertension                | 103  | 299217.86   | 34.42  | 0.97 (0.80 to 1.18)  | 1.08 (0.89 to 1.32)  |
|                                  | Pregestational hypertension | 58   | 145461.64   | 39.87  | 1.10 (0.85 to 1.42)  | 1.28 (0.98 to 1.65)  |
|                                  | Gestational hypertension    | 45   | 153756.22   | 29.27  | 0.85 (0.63 to 1.14)  | 0.91 (0.68 to 1.22)  |
| <b>Offspring born after 1994</b> | <b>No maternal HDP</b>      | 5218 | 17255033.13 | 30.24  | 1.0 (Reference)      | 1.0 (Reference)      |
|                                  | <b>Maternal HDP</b>         | 345  | 736186.88   | 46.86  | 1.46 (1.31 to 1.63)  | 1.39 (1.24 to 1.55)  |
|                                  | Pre-eclampsia or Eclampsia  | 262  | 476813.12   | 54.95  | 1.78 (1.57 to 2.02)  | 1.56 (1.38 to 1.77)  |
|                                  | Pre-eclampsia               | 257  | 471680.12   | 54.49  | 1.76 (1.56 to 2.00)  | 1.55 (1.36 to 1.76)  |
|                                  | Moderate                    | 99   | 336148.10   | 29.45  | 0.96 (0.79 to 1.17)  | 0.86 (0.70 to 1.05)  |
|                                  | Severe                      | 116  | 92899.28    | 124.87 | 3.98 (3.31 to 4.78)  | 3.28 (2.72 to 3.95)  |
|                                  | HELLP syndrome              | 27   | 18352.42    | 147.12 | 4.42 (3.03 to 6.45)  | 4.14 (2.84 to 6.06)  |
|                                  | Unspecified                 | 15   | 24280.32    | 61.78  | 2.11 (1.27 to 3.51)  | 1.91 (1.15 to 3.17)  |
|                                  | Eclampsia <sup>b</sup>      | -    | 5133.00     | 97.41  | 3.21 (1.34 to 7.72)  | 2.74 (1.14 to 6.58)  |
|                                  | Hypertension                | 83   | 259373.76   | 32.00  | 0.94 (0.76 to 1.17)  | 1.02 (0.82 to 1.27)  |
|                                  | Pregestational hypertension | 48   | 134081.02   | 35.80  | 1.04 (0.78 to 1.38)  | 1.15 (0.86 to 1.53)  |
|                                  | Gestational hypertension    | 35   | 125292.74   | 27.93  | 0.83 (0.59 to 1.15)  | 0.89 (0.64 to 1.24)  |
| <b>Offspring born after 2004</b> | <b>No maternal HDP</b>      | 1904 | 5628441.07  | 33.83  | 1.0 (Reference)      | 1.0 (Reference)      |
|                                  | <b>Maternal HDP</b>         | 120  | 287392.56   | 41.75  | 1.20 (1.00 to 1.44)  | 1.05 (0.87 to 1.27)  |
|                                  | Pre-eclampsia or Eclampsia  | 95   | 163632.13   | 58.06  | 1.68 (1.37 to 2.06)  | 1.36 (1.10 to 1.67)  |
|                                  | Pre-eclampsia               | 94   | 161962.64   | 58.04  | 1.68 (1.36 to 2.06)  | 1.36 (1.10 to 1.67)  |
|                                  | Moderate                    | 31   | 112054.80   | 27.67  | 0.80 (0.56 to 1.14)  | 0.66 (0.46 to 0.95)  |
|                                  | Severe                      | 42   | 33829.56    | 124.15 | 3.58 (2.64 to 4.86)  | 2.67 (1.96 to 3.64)  |
|                                  | HELLP syndrome              | 16   | 8897.57     | 179.82 | 5.34 (3.26 to 8.73)  | 4.28 (2.61 to 7.02)  |
|                                  | Unspecified <sup>b</sup>    | -    | 7180.70     | 69.63  | 2.12 (0.88 to 5.11)  | 1.73 (0.72 to 4.16)  |
|                                  | Eclampsia <sup>b</sup>      | -    | 1669.49     | 59.90  | 1.75 (0.25 to 12.44) | 1.50 (0.21 to 10.68) |
|                                  | Hypertension                | 25   | 123760.44   | 20.20  | 0.57 (0.39 to 0.85)  | 0.57 (0.38 to 0.84)  |
|                                  | Pregestational hypertension | 17   | 68548.02    | 24.80  | 0.72 (0.45 to 1.16)  | 0.70 (0.44 to 1.14)  |

|                                         |                              |                        |            |             |                      |                      |
|-----------------------------------------|------------------------------|------------------------|------------|-------------|----------------------|----------------------|
|                                         | Gestational hypertension     | 8                      | 55212.42   | 14.49       | 0.40 (0.20 to 0.80)  | 0.40 (0.20 to 0.80)  |
| <b>Complete case analysis</b>           | <b>No maternal HDP</b>       | 1741                   | 5945848.11 | 29.28       | 1.0 (Reference)      | 1.0 (Reference)      |
|                                         | <b>Maternal HDP</b>          | 105                    | 297367.76  | 35.31       | 1.16 (0.95 to 1.41)  | 1.01 (0.83 to 1.23)  |
|                                         | Pre-eclampsia or Eclampsia   | 80                     | 170220.86  | 47.00       | 1.56 (1.25 to 1.95)  | 1.26 (1.00 to 1.58)  |
|                                         | Pre-eclampsia                | 77                     | 168625.80  | 45.66       | 1.52 (1.21 to 1.91)  | 1.22 (0.97 to 1.54)  |
|                                         | Moderate                     | 29                     | 117535.33  | 24.67       | 0.82 (0.57 to 1.18)  | 0.67 (0.46 to 0.97)  |
|                                         | Severe                       | 33                     | 33978.11   | 97.12       | 3.21 (2.27 to 4.52)  | 2.44 (1.72 to 3.46)  |
|                                         | HELLP syndrome               | 12                     | 9098.51    | 131.89      | 4.45 (2.52 to 7.86)  | 3.69 (2.09 to 6.52)  |
|                                         | Unspecified <sup>b</sup>     | -                      | 8013.84    | 37.44       | 1.33 (0.43 to 4.12)  | 1.06 (0.34 to 3.29)  |
|                                         | Eclampsia <sup>b</sup>       | -                      | 1595.06    | 188.08      | 6.21 (2.00 to 19.27) | 5.44 (1.75 to 16.88) |
|                                         | Hypertension                 | 25                     | 127146.90  | 19.66       | 0.64 (0.43 to 0.95)  | 0.62 (0.42 to 0.92)  |
|                                         | Pre-gestational hypertension | 17                     | 69808.37   | 24.35       | 0.80 (0.50 to 1.29)  | 0.79 (0.49 to 1.27)  |
|                                         | Gestational hypertension     | 8                      | 57338.52   | 13.95       | 0.45 (0.22 to 0.89)  | 0.43 (0.21 to 0.86)  |
|                                         | <b>Singleton births</b>      | <b>No maternal HDP</b> | 17946      | 44270955.38 | 40.54                | 1.0 (Reference)      |
| <b>Maternal HDP</b>                     |                              | 927                    | 1719042.47 | 53.93       | 1.30 (1.21 to 1.38)  | 1.32 (1.23 to 1.41)  |
| Pre-eclampsia or Eclampsia              |                              | 714                    | 1236530.82 | 57.74       | 1.43 (1.32 to 1.54)  | 1.37 (1.27 to 1.48)  |
| Pre-eclampsia                           |                              | 699                    | 1224683.31 | 57.08       | 1.41 (1.30 to 1.52)  | 1.35 (1.25 to 1.46)  |
| Moderate                                |                              | 377                    | 942828.29  | 39.99       | 0.99 (0.89 to 1.10)  | 0.93 (0.84 to 1.03)  |
| Severe                                  |                              | 246                    | 186405.07  | 131.97      | 3.20 (2.82 to 3.63)  | 3.35 (2.96 to 3.81)  |
| HELLP syndrome                          |                              | 28                     | 16092.63   | 173.99      | 3.59 (2.48 to 5.20)  | 6.36 (4.39 to 9.23)  |
| Unspecified <sup>d</sup>                |                              | 48                     | 79357.33   | 60.49       | 1.55 (1.16 to 2.05)  | 1.44 (1.09 to 1.91)  |
| Eclampsia                               |                              | 15                     | 11847.51   | 126.61      | 3.10 (1.87 to 5.15)  | 2.94 (1.77 to 4.87)  |
| Hypertension                            |                              | 213                    | 482511.65  | 44.14       | 1.00 (0.87 to 1.14)  | 1.17 (1.02 to 1.34)  |
| Pre-gestational hypertension            |                              | 77                     | 174686.64  | 44.08       | 0.94 (0.75 to 1.17)  | 1.33 (1.06 to 1.67)  |
| Gestational hypertension                |                              | 136                    | 307825.01  | 44.18       | 1.03 (0.87 to 1.22)  | 1.10 (0.93 to 1.31)  |
| <b>Excluding individuals exposed to</b> |                              | <b>No maternal HDP</b> | 19119      | 45534378.72 | 41.99                | 1.0 (Reference)      |

|                                                                    |                             |       |             |        |                     |                     |
|--------------------------------------------------------------------|-----------------------------|-------|-------------|--------|---------------------|---------------------|
| <b>pregestational hypertension</b>                                 |                             |       |             |        |                     |                     |
|                                                                    | <b>Maternal HDP</b>         | 940   | 1658300.32  | 56.68  | 1.33 (1.25 to 1.42) | 1.26 (1.18 to 1.34) |
|                                                                    | Pre-eclampsia or Eclampsia  | 798   | 1337690.23  | 59.66  | 1.42 (1.32 to 1.52) | 1.30 (1.21 to 1.40) |
|                                                                    | Pre-eclampsia               | 781   | 1324978.47  | 58.94  | 1.40 (1.30 to 1.50) | 1.29 (1.20 to 1.38) |
|                                                                    | Moderate                    | 423   | 1013731.05  | 41.73  | 1.00 (0.91 to 1.10) | 0.90 (0.82 to 0.99) |
|                                                                    | Severe                      | 279   | 208803.94   | 133.62 | 3.10 (2.75 to 3.49) | 2.99 (2.66 to 3.37) |
|                                                                    | HELLP syndrome              | 30    | 18671.24    | 160.67 | 3.11 (2.18 to 4.45) | 4.79 (3.34 to 6.86) |
|                                                                    | Unspecified                 | 49    | 83772.24    | 58.49  | 1.44 (1.09 to 1.91) | 1.30 (0.98 to 1.72) |
|                                                                    | Eclampsia                   | 17    | 12711.76    | 133.73 | 3.17 (1.97 to 5.10) | 2.88 (1.79 to 4.63) |
|                                                                    | Gestational hypertension    | 142   | 320610.09   | 44.29  | 1.00 (0.85 to 1.18) | 1.06 (0.90 to 1.25) |
| <b>Additional adjustment for Charlson Comorbidity Index scores</b> | <b>No maternal HDP</b>      | 19119 | 45534378.72 | 41.99  | 1.0 (Reference)     | 1.0 (Reference)     |
|                                                                    | <b>Maternal HDP</b>         | 1021  | 1840136.80  | 55.49  | 1.28 (1.21 to 1.37) | 1.25 (1.18 to 1.34) |
|                                                                    | Pre-eclampsia or Eclampsia  | 798   | 1337690.23  | 59.66  | 1.42 (1.32 to 1.52) | 1.30 (1.21 to 1.39) |
|                                                                    | Pre-eclampsia               | 781   | 1324978.47  | 58.94  | 1.40 (1.30 to 1.50) | 1.28 (1.19 to 1.38) |
|                                                                    | Moderate                    | 423   | 1013731.05  | 41.73  | 1.00 (0.91 to 1.10) | 0.90 (0.82 to 0.99) |
|                                                                    | Severe                      | 279   | 208803.94   | 133.62 | 3.10 (2.75 to 3.49) | 2.98 (2.64 to 3.36) |
|                                                                    | HELLP syndrome              | 30    | 18671.24    | 160.67 | 3.11 (2.18 to 4.45) | 4.78 (3.34 to 6.85) |
|                                                                    | Unspecified                 | 49    | 83772.24    | 58.49  | 1.44 (1.09 to 1.91) | 1.30 (0.98 to 1.72) |
|                                                                    | Eclampsia                   | 17    | 12711.76    | 133.73 | 3.17 (1.97 to 5.10) | 2.87 (1.79 to 4.63) |
|                                                                    | Hypertension                | 223   | 502446.57   | 44.38  | 0.96 (0.84 to 1.10) | 1.11 (0.98 to 1.27) |
|                                                                    | Pregestational hypertension | 81    | 181836.48   | 44.55  | 0.90 (0.72 to 1.12) | 1.25 (1.00 to 1.56) |
|                                                                    | Gestational hypertension    | 142   | 320610.09   | 44.29  | 1.00 (0.85 to 1.18) | 1.05 (0.89 to 1.24) |
| <b>All livebirths in 1977-2018</b>                                 | <b>No maternal HDP</b>      | 21943 | 50108433.17 | 43.79  | 1.0 (Reference)     | 1.0 (Reference)     |

|  |                             |      |            |        |                     |                     |
|--|-----------------------------|------|------------|--------|---------------------|---------------------|
|  | <b>Maternal HDP</b>         | 1117 | 1996266.80 | 55.95  | 1.24 (1.17 to 1.32) | 1.22 (1.14 to 1.29) |
|  | Pre-eclampsia or Eclampsia  | 877  | 1461390.61 | 60.01  | 1.37 (1.28 to 1.46) | 1.26 (1.18 to 1.35) |
|  | Pre-eclampsia               | 857  | 1446772.00 | 59.24  | 1.35 (1.26 to 1.44) | 1.25 (1.16 to 1.33) |
|  | Moderate                    | 479  | 1119415.24 | 42.79  | 0.98 (0.89 to 1.07) | 0.89 (0.81 to 0.98) |
|  | Severe                      | 290  | 217826.07  | 133.13 | 2.97 (2.64 to 3.33) | 2.91 (2.59 to 3.27) |
|  | HELLP syndrome              | 30   | 18730.61   | 160.17 | 2.99 (2.09 to 4.27) | 4.73 (3.30 to 6.77) |
|  | Unspecified                 | 58   | 90800.08   | 63.88  | 1.51 (1.17 to 1.95) | 1.35 (1.04 to 1.74) |
|  | Eclampsia                   | 20   | 14618.60   | 136.81 | 3.11 (2.00 to 4.82) | 2.69 (1.74 to 4.18) |
|  | Hypertension                | 240  | 534876.19  | 44.87  | 0.94 (0.82 to 1.06) | 1.07 (0.94 to 1.22) |
|  | Pregestational hypertension | 83   | 185439.29  | 44.76  | 0.87 (0.70 to 1.08) | 1.20 (0.96 to 1.49) |
|  | Gestational hypertension    | 157  | 349436.90  | 44.93  | 0.98 (0.83 to 1.14) | 1.03 (0.88 to 1.20) |

Abbreviations: HDP, hypertensive disorder of pregnancy; cHR, crude hazard ratio; aHR, adjusted hazard ratio.

<sup>a</sup> Offspring's age as time scale, adjusted for calendar year, sex, singleton, parity, birth year of the child, maternal age, maternal smoking, maternal cohabitation, maternal country of origin, maternal residence, maternal education, maternal income at birth, maternal pre-pregnancy BMI, maternal history of diabetes and parental CVD before childbirth.

<sup>b</sup> Less than 6 cases are not allowed to report.

**Table S7. Association between maternal HDP and all-cause mortality in offspring using restricted cubic splines for continuous covariates**

| <b>Exposure</b> | <b>No. of deaths</b> | <b>Follow-up time (person years)</b> | <b>Rate (1/10<sup>5</sup> person years)</b> | <b>cHR (95%CI)</b>  | <b>aHR<sup>a</sup> (95%CI)</b> |
|-----------------|----------------------|--------------------------------------|---------------------------------------------|---------------------|--------------------------------|
| No maternal HDP | 19119                | 45534378.72                          | 41.99                                       | 1.0 (Reference)     | 1.0 (reference)                |
| Maternal HDP    | 1021                 | 1840136.80                           | 55.49                                       | 1.28 (1.21 to 1.37) | 1.29 (1.20 to 1.37)            |

Abbreviations: HDP, hypertensive disorder of pregnancy; cHR, crude hazard ratio; aHR, adjusted hazard ratio.

<sup>a</sup> Offspring's age as time scale, adjusted for calendar year, country, sex, singleton, parity, birth year of the child, maternal age, maternal smoking, maternal cohabitation, maternal country of origin, maternal residence, maternal education, maternal income at birth, maternal pre-pregnancy BMI, maternal history of diabetes and CVD before childbirth, parental history of CVD before childbirth.

**Table S8. The risk of all-cause mortality in offspring according to the timing and severity of maternal pre-eclampsia based on different cutoff points of 35 or 36 weeks for timing of pre-eclampsia<sup>a</sup>**

|                                                                 | No. of deaths | Follow-up time (person years) | Rate (1/10 <sup>5</sup> person years) | cHR(95%CI)          | aHR <sup>b</sup> (95%CI) |
|-----------------------------------------------------------------|---------------|-------------------------------|---------------------------------------|---------------------|--------------------------|
| <b>Timing of pre-eclampsia defined by 35 weeks of gestation</b> |               |                               |                                       |                     |                          |
| No maternal HDP                                                 | 19119         | 45534378.72                   | 41.99                                 | 1.0 (Reference)     | 1.0 (Reference)          |
| <b>By timing of pre-eclampsia</b>                               |               |                               |                                       |                     |                          |
| Late-onset                                                      | 300           | 848998.87                     | 35.34                                 | 0.86 (0.77 to 0.97) | 0.77 (0.68 to 0.86)      |
| Early-onset                                                     | 432           | 392207.36                     | 110.15                                | 2.45 (2.23 to 2.69) | 2.45 (2.23 to 2.70)      |
| <b>By severity of pre-eclampsia</b>                             |               |                               |                                       |                     |                          |
| Moderate                                                        | 423           | 1013731.05                    | 41.73                                 | 1.00 (0.91 to 1.10) | 0.90 (0.82 to 0.99)      |
| Severe and HELLP                                                | 309           | 227475.18                     | 135.84                                | 3.10 (2.77 to 3.47) | 3.10 (2.77 to 3.47)      |
| <b>Interaction for timing and severity of pre-eclampsia</b>     |               |                               |                                       |                     |                          |
| Late-onset * Moderate                                           | 253           | 739662.19                     | 34.20                                 | 0.84 (0.74 to 0.95) | 0.74 (0.65 to 0.84)      |
| Late-onset * Severe/HELLP                                       | 47            | 109336.68                     | 42.99                                 | 0.99 (0.74 to 1.32) | 0.96 (0.72 to 1.27)      |
| Early-onset * Moderate                                          | 170           | 274068.86                     | 62.03                                 | 1.37 (1.18 to 1.59) | 1.35 (1.16 to 1.57)      |
| Early-onset * Severe/HELLP                                      | 262           | 118138.50                     | 221.77                                | 5.02 (4.45 to 5.67) | 5.22 (4.62 to 5.91)      |
| <b>Timing of pre-eclampsia defined by 36 weeks of gestation</b> |               |                               |                                       |                     |                          |
| No maternal HDP                                                 | 19119         | 45534378.72                   | 41.99                                 | 1.0 (Reference)     | 1.0 (Reference)          |
| <b>By timing of pre-eclampsia</b>                               |               |                               |                                       |                     |                          |
| Late-onset                                                      | 254           | 751540.72                     | 33.80                                 | 0.83 (0.73 to 0.93) | 0.74 (0.65 to 0.84)      |
| Early-onset                                                     | 478           | 489665.51                     | 97.62                                 | 2.21 (2.02 to 2.42) | 2.13 (1.94 to 2.34)      |
| <b>By severity of pre-eclampsia</b>                             |               |                               |                                       |                     |                          |
| Moderate                                                        | 423           | 1013731.05                    | 41.73                                 | 1.00 (0.91 to 1.10) | 0.90 (0.82 to 0.99)      |
| Severe and HELLP                                                | 309           | 227475.18                     | 135.84                                | 3.10 (2.77 to 3.47) | 3.10 (2.77 to 3.47)      |
| <b>Interaction for timing and severity of pre-eclampsia</b>     |               |                               |                                       |                     |                          |
| Late-onset * Moderate                                           | 224           | 663368.13                     | 33.77                                 | 0.83 (0.73 to 0.95) | 0.73 (0.64 to 0.84)      |
| Late-onset * Severe/HELLP                                       | 30            | 88172.59                      | 34.02                                 | 0.78 (0.55 to 1.12) | 0.77 (0.54 to 1.10)      |
| Early-onset * Moderate                                          | 199           | 350362.92                     | 56.80                                 | 1.28 (1.12 to 1.48) | 1.22 (1.06 to 1.40)      |

|                            |     |           |        |                     |                     |
|----------------------------|-----|-----------|--------|---------------------|---------------------|
| Early-onset * Severe/HELLP | 279 | 139302.59 | 200.28 | 4.55 (4.05 to 5.13) | 4.61 (4.09 to 5.20) |
|----------------------------|-----|-----------|--------|---------------------|---------------------|

Abbreviations: HDP, hypertensive disorder of pregnancy; cHR, crude hazard ratio; aHR, adjusted hazard ratio.

<sup>a</sup> Includes moderate pre-eclampsia, severe pre-eclampsia, and HELLP syndrome.

<sup>b</sup> Offspring's age as time scale, adjusted for calendar year, country, sex, singleton, parity, birth year of the child, maternal age, maternal smoking, maternal cohabitation, maternal country of origin, maternal residence, maternal education, maternal income at birth, maternal pre-pregnancy BMI, maternal history of diabetes and CVD before childbirth, parental history of CVD before childbirth.



**Table S9. Associations between maternal HDP and all-cause mortality in offspring according to different follow up years**

| <b>Follow up years</b> | <b>Exposure</b> | <b>No. of Deaths</b> | <b>Follow-up time (person years)</b> | <b>Rate (1/10<sup>5</sup> person years)</b> | <b>cHR (95%CI)</b>  | <b>aHR<sup>a</sup> (95%CI)</b> |
|------------------------|-----------------|----------------------|--------------------------------------|---------------------------------------------|---------------------|--------------------------------|
| 0~5                    | No maternal HDP | 10650                | 10853890.38                          | 98.12                                       | 1.0 (reference)     | 1.0 (reference)                |
|                        | Maternal HDP    | 656                  | 466792.64                            | 140.53                                      | 1.42 (1.31 to 1.54) | 1.39 (1.29 to 1.51)            |
| 0~10                   | No maternal HDP | 11721                | 20286705.48                          | 57.78                                       | 1.0 (reference)     | 1.0 (reference)                |
|                        | Maternal HDP    | 687                  | 854286.15                            | 80.42                                       | 1.36 (1.26 to 1.46) | 1.34 (1.24 to 1.45)            |
| 0~15                   | No maternal HDP | 12627                | 28244542.46                          | 44.71                                       | 1.0 (reference)     | 1.0 (reference)                |
|                        | Maternal HDP    | 723                  | 1166762.02                           | 61.97                                       | 1.33 (1.24 to 1.44) | 1.32 (1.22 to 1.42)            |
| 0~20                   | No maternal HDP | 14504                | 34694942.03                          | 41.80                                       | 1.0 (reference)     | 1.0 (reference)                |
|                        | Maternal HDP    | 809                  | 1415746.72                           | 57.14                                       | 1.32 (1.23 to 1.41) | 1.30 (1.21 to 1.39)            |
| 0~25                   | No maternal HDP | 16409                | 39599421.39                          | 41.44                                       | 1.0 (reference)     | 1.0 (reference)                |
|                        | Maternal HDP    | 907                  | 1605513.46                           | 56.49                                       | 1.32 (1.23 to 1.41) | 1.30 (1.21 to 1.39)            |
| 0~30                   | No maternal HDP | 17708                | 42904382.08                          | 41.27                                       | 1.0 (reference)     | 1.0 (reference)                |
|                        | Maternal HDP    | 962                  | 1735817.59                           | 55.42                                       | 1.30 (1.22 to 1.39) | 1.28 (1.20 to 1.37)            |
| 0~35                   | No maternal HDP | 18622                | 44799855.16                          | 41.57                                       | 1.0 (reference)     | 1.0 (reference)                |
|                        | Maternal HDP    | 997                  | 1812016.11                           | 55.02                                       | 1.28 (1.20 to 1.37) | 1.26 (1.18 to 1.34)            |
| 0~41                   | No maternal HDP | 19119                | 45534378.72                          | 41.99                                       | 1.0 (reference)     | 1.0 (reference)                |
|                        | Maternal HDP    | 1021                 | 1840136.80                           | 55.49                                       | 1.28 (1.21 to 1.37) | 1.26 (1.18 to 1.34)            |

Abbreviations: HDP, hypertensive disorder of pregnancy; cHR, crude hazard ratio; aHR, adjusted hazard ratio.

<sup>a</sup> Offspring's age as time scale, adjusted for calendar year, country, sex, singleton, parity, birth year of the child, maternal age, maternal smoking, maternal cohabitation, maternal country of origin, maternal residence, maternal education, maternal income at birth, maternal pre-pregnancy BMI, maternal history of diabetes and CVD before childbirth, parental history of CVD before childbirth.

**Table S10. Associations between maternal HDP and all-cause mortality in offspring in different age groups**

| Age of offspring | Exposure        | No. of Deaths | Follow-up time (person years) | Rate (1/10 <sup>5</sup> person years) | cHR (95%CI)         | aHR <sup>a</sup> (95%CI) |
|------------------|-----------------|---------------|-------------------------------|---------------------------------------|---------------------|--------------------------|
| 0~18             | No maternal HDP | 13561         | 32298425.78                   | 41.99                                 | 1.0 (reference)     | 1.0 (reference)          |
|                  | Maternal HDP    | 762           | 1323402.82                    | 57.58                                 | 1.32 (1.22 to 1.42) | 1.30 (1.21 to 1.40)      |
| ≥19              | No maternal HDP | 5558          | 13235952.95                   | 41.99                                 | 1.0 (reference)     | 1.0 (reference)          |
|                  | Maternal HDP    | 259           | 516733.98                     | 50.12                                 | 1.19 (1.05 to 1.35) | 1.14 (1.01 to 1.29)      |

Abbreviations: HDP, hypertensive disorder of pregnancy; cHR, crude hazard ratio; aHR, adjusted hazard ratio.

<sup>a</sup> Offspring's age as time scale, adjusted for calendar year, sex, singleton, parity, birth year of the child, maternal age, maternal smoking, maternal cohabitation, maternal country of origin, maternal residence, maternal education, maternal income at birth, maternal pre-pregnancy BMI, maternal history of diabetes and parental CVD before childbirth.

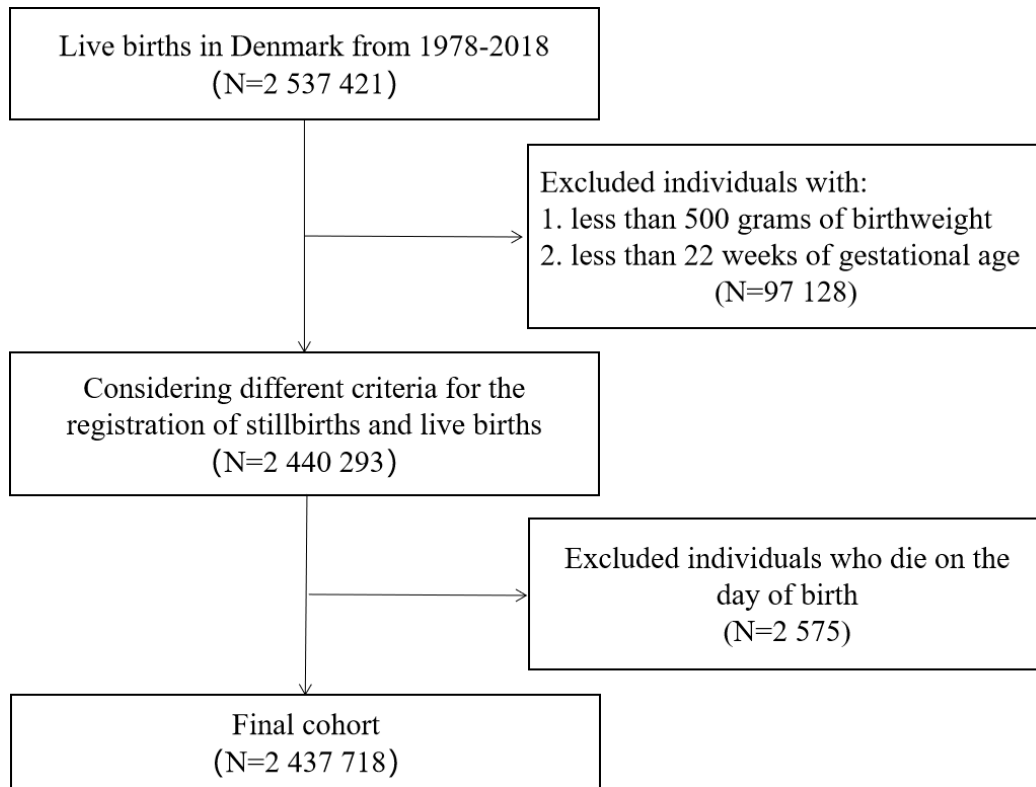

**Figure S1. Flow chart of the study population**

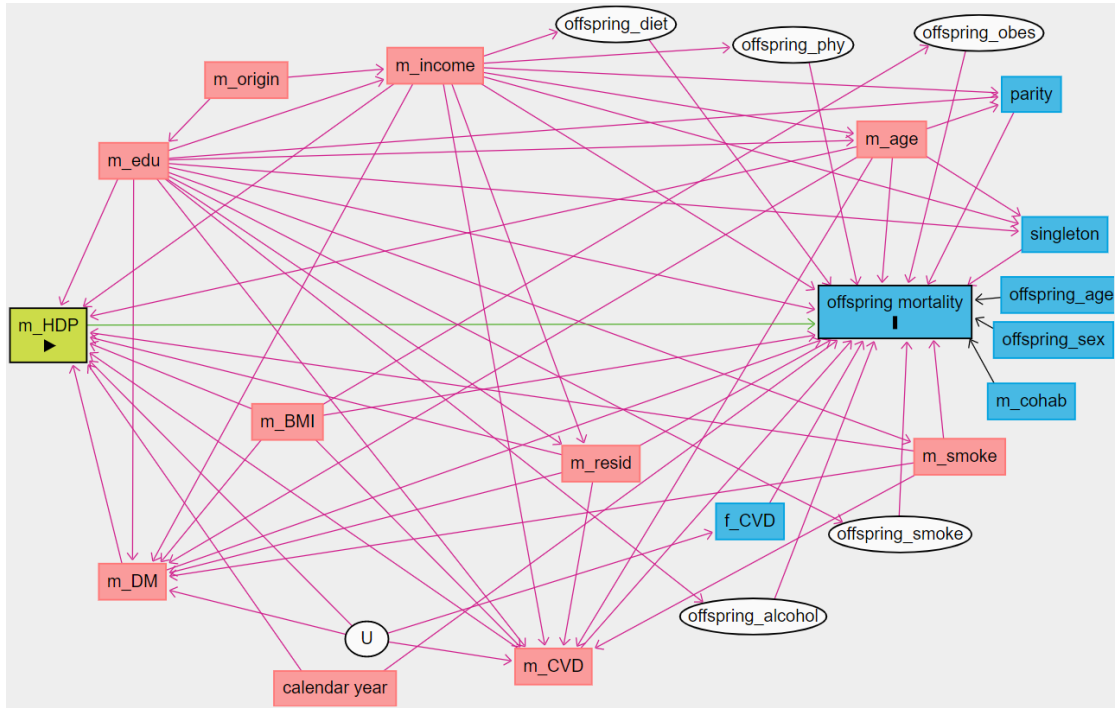

**Figure S2. Causal diagram showing selection of covariates for confounding control**

<sup>a</sup>m\_HPD: maternal hypertensive disorder of pregnancy, m\_age: maternal age, m\_smoke: maternal smoking, m\_edu: maternal education, m\_income: maternal income, m\_cohab: maternal cohabitation, m\_origin: maternal country of origin, m\_resid: maternal residence at birth, m\_BMI: maternal BMI, m\_CVD: maternal history of CVD before childbirth, m\_DM: maternal history of diabetes before childbirth, f\_CVD: paternal history of CVD before childbirth, offspring\_diet: offspring diet, offspring\_phy: offspring physical activity, offspring\_obes: offspring obesity, offspring\_smoke: offspring smoking status, offspring\_alcohol: offspring alcohol use; U: unmeasured variables

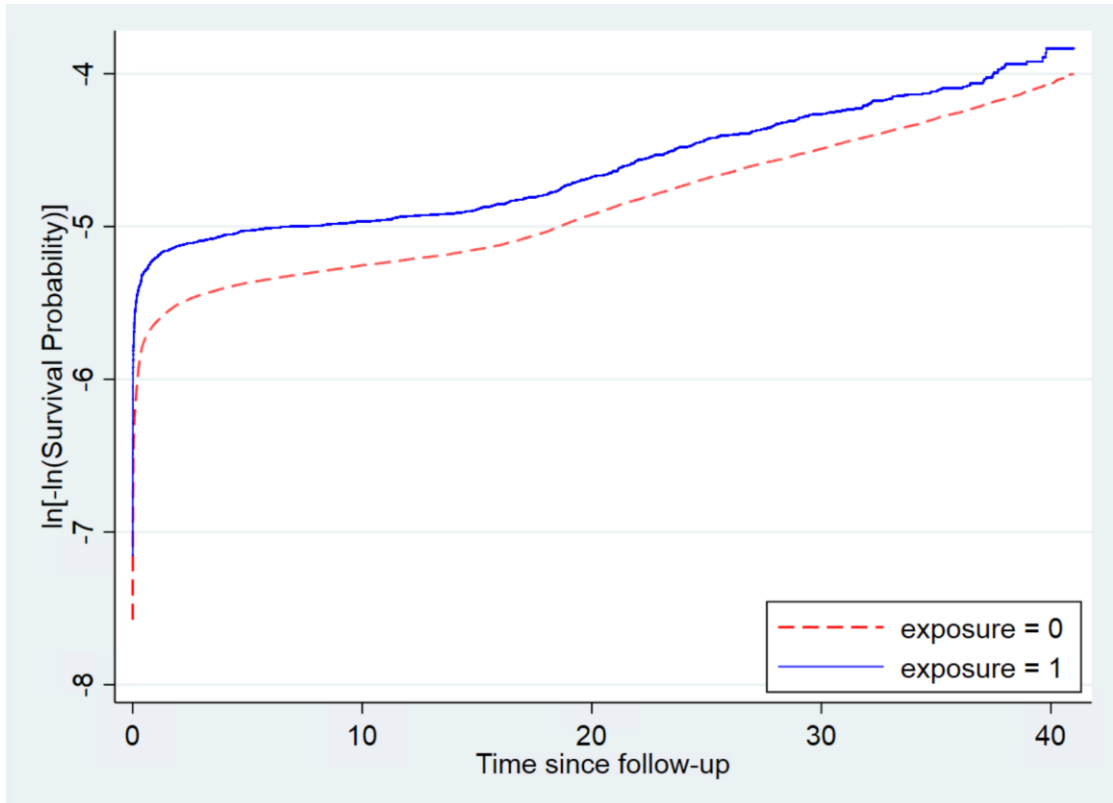

**Figure S3. The log-minus-log survival curve for maternal HDP and all-cause mortality in offspring**

**A. Malignant neoplasms**

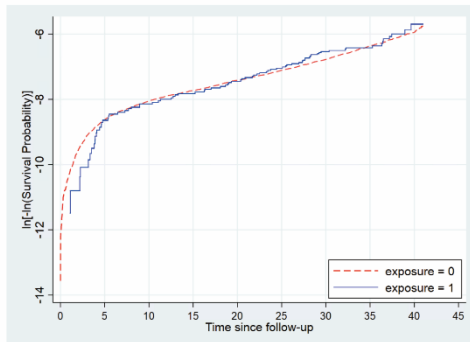

**B. Certain conditions originating in the perinatal period**

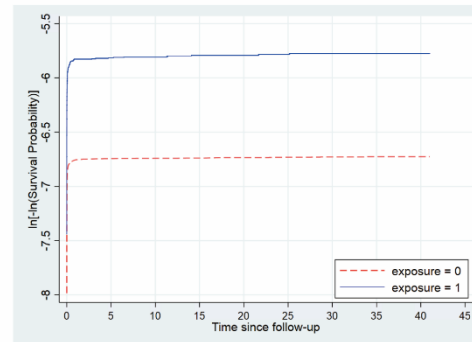

**C. Congenital malformations and chromosomal abnormalities**

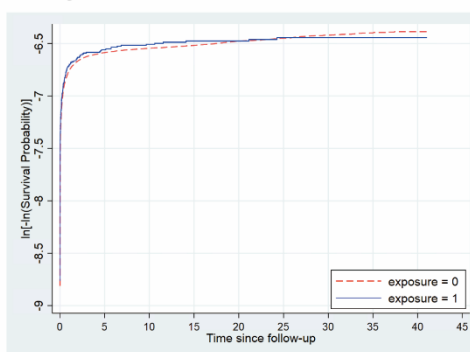

**D. External causes of morbidity and mortality**

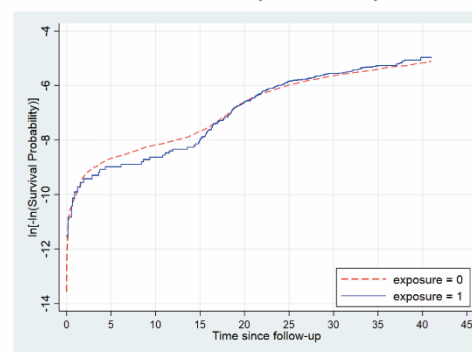

**E. Other causes**

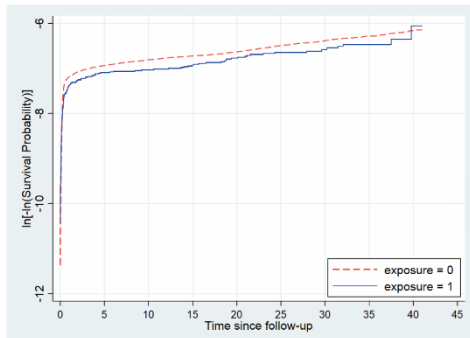

**Figure S4. The log-minus-log survival curves for maternal HDP and cause-specific mortality in offspring**

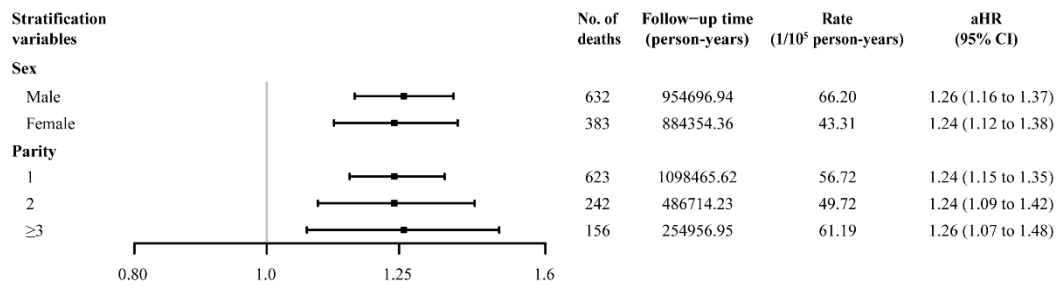

**Figure S5. Associations between maternal HDP and all-cause mortality in offspring by sex and parity**

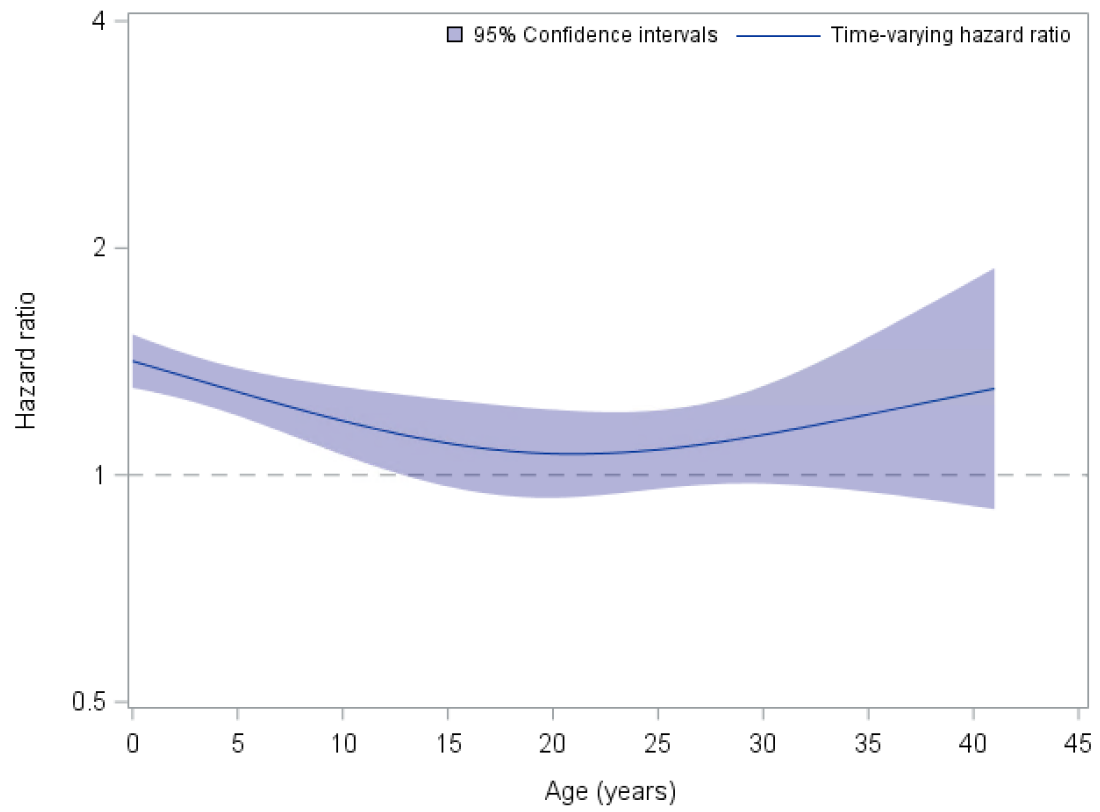

**Figure S6. Change of all-cause mortality risk over offspring age among offspring exposed to maternal HDP compared to unexposed offspring**



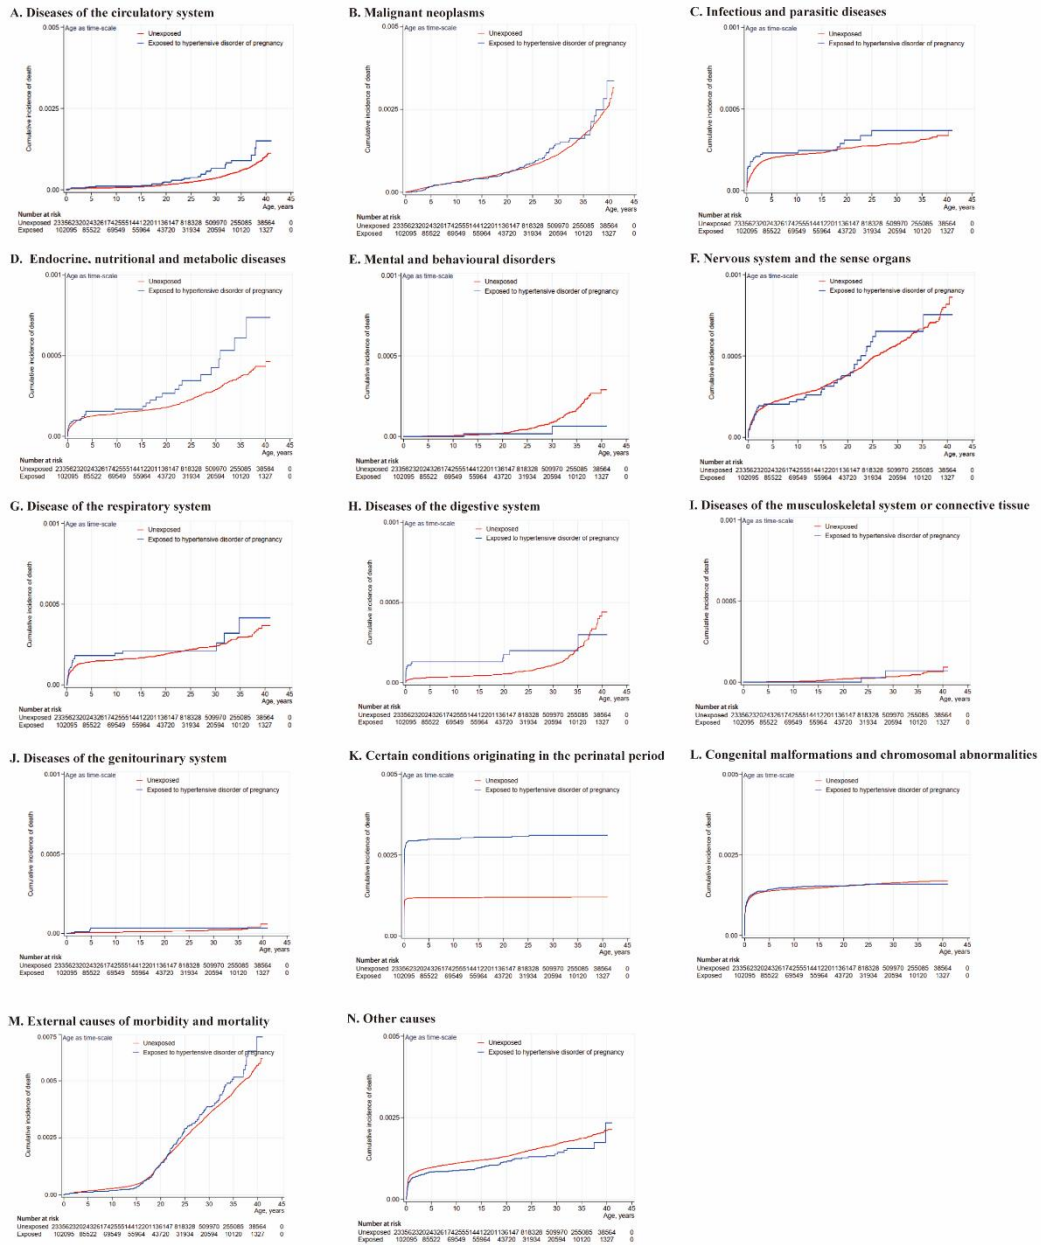

**Figure S7. Cumulative incidence of cause-specific mortality among offspring exposed and unexposed to maternal HDP**

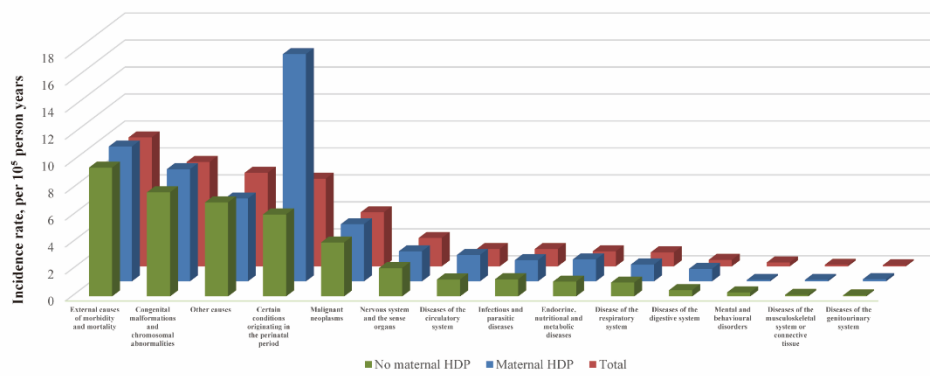

| Exposure        | Cause-specific mortality                   |                                                        |                 |                                                        |                     |                                     |                                    |                                   |                                               |                                   |                                  |                                  |                                                             |                                      |
|-----------------|--------------------------------------------|--------------------------------------------------------|-----------------|--------------------------------------------------------|---------------------|-------------------------------------|------------------------------------|-----------------------------------|-----------------------------------------------|-----------------------------------|----------------------------------|----------------------------------|-------------------------------------------------------------|--------------------------------------|
|                 | External causes of morbidity and mortality | Congenital malformations and chromosomal abnormalities | Other causes    | Certain conditions originating in the perinatal period | Malignant neoplasms | Nervous system and the sense organs | Diseases of the circulatory system | Infectious and parasitic diseases | Endocrine, nutritional and metabolic diseases | Disease of the respiratory system | Diseases of the digestive system | Mental and behavioural disorders | Diseases of the musculoskeletal system or connective tissue | Diseases of the genitourinary system |
| No maternal HDP | 9.54(9.26-9.83)                            | 7.72(7.47-7.98)                                        | 6.97(6.73-7.22) | 6.08(5.86-6.31)                                        | 3.99(3.82-4.18)     | 2.10(1.97-2.23)                     | 1.26(1.16-1.36)                    | 1.27(1.17-1.38)                   | 1.09(1.00-1.19)                               | 1.03(0.94-1.12)                   | 0.46(0.40-0.53)                  | 0.29(0.25-0.35)                  | 0.11(0.09-0.15)                                             | 0.07(0.05-0.10)                      |
| Maternal HDP    | 10.00(8.65-11.55)                          | 8.31(7.10-9.74)                                        | 6.14(5.11-7.38) | 16.85(15.07-18.83)                                     | 4.24(3.40-5.29)     | 2.23(1.64-3.03)                     | 1.96(1.41-2.71)                    | 1.58(1.10-2.27)                   | 1.63(1.14-2.33)                               | 1.25(0.83-1.88)                   | 0.92(0.57-1.49)                  | 0.11(0.03-0.43)                  | 0.11(0.03-0.43)                                             | 0.16(0.05-0.51)                      |
| Total           | 9.56(9.29-9.84)                            | 7.74(7.49-8.00)                                        | 6.94(6.71-7.18) | 6.50(6.27-6.73)                                        | 4.00(3.83-4.19)     | 2.10(1.98-2.24)                     | 1.28(1.19-1.39)                    | 1.28(1.18-1.39)                   | 1.11(1.02-1.21)                               | 1.03(0.95-1.13)                   | 0.48(0.43-0.55)                  | 0.29(0.24-0.34)                  | 0.11(0.09-0.15)                                             | 0.08(0.06-0.11)                      |

**Figure S8. Incidence rates (95% CIs) of cause-specific mortality according to maternal HDP**
